# Supplementary material for: Characterizing the surge behaviour and associated ice-dammed lake evolution of the Kyagar Glacier in the Karakoram
Source: Copernicus journal article supplement (doi:10.5194/tc-17-2891-2023), 2023-07-18

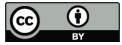

*Supplement of*

## **Characterizing the surge behaviour and associated ice-dammed lake evolution of the Kyagar Glacier in the Karakoram**

**Guanyu Li et al.**

*Correspondence to:* Mingyang Lv (lmynju@163.com)

The copyright of individual parts of the supplement might differ from the article licence.

**Table S1.** Mean differences and the standard deviation (SD) of elevation difference maps over off-glacier areas before and after co-registration process.

| DEM Product ID             | Date       | Statistics of stable ground differences (Product vs SRTM) (m) |        |           |         |
|----------------------------|------------|---------------------------------------------------------------|--------|-----------|---------|
|                            |            | Pre-mean                                                      | Pre-SD | Post-mean | Post-SD |
| AST14DEM_00302272001055811 | 2001/2/27  | 5.34                                                          | 10.76  | -0.08     | 10.30   |
| AST14DEM_00303312001055714 | 2001/3/31  | 9.81                                                          | 22.63  | 0.67      | 15.19   |
| AST14DEM_00304252001055043 | 2001/4/25  | 33.19                                                         | 20.55  | 1.20      | 19.53   |
| AST14DEM_00308022002054207 | 2002/8/2   | 6.14                                                          | 13.33  | 0.68      | 10.74   |
| AST14DEM_00305082003054658 | 2003/5/8   | 10.44                                                         | 37.89  | 0.15      | 39.34   |
| AST14DEM_00305032004054046 | 2004/5/3   | 5.09                                                          | 18.78  | 1.56      | 14.29   |
| AST14DEM_00305032004054037 | 2004/5/3   | 7.11                                                          | 16.65  | 1.71      | 12.07   |
| AST14DEM_00306112004054637 | 2004/6/11  | 2.11                                                          | 18.26  | 0.38      | 16.93   |
| AST14DEM_00310202005054549 | 2005/10/20 | -2.96                                                         | 11.45  | 0.14      | 9.58    |
| AST14DEM_00311142005053944 | 2005/11/14 | 24.86                                                         | 22.21  | 1.06      | 22.32   |
| AST14DEM_00311142005053953 | 2005/11/14 | 25.24                                                         | 21.46  | 1.45      | 21.73   |
| AST14DEM_00311302005053951 | 2005/11/30 | 20.14                                                         | 17.15  | 1.83      | 16.77   |
| AST14DEM_00302092006054532 | 2006/2/9   | -15.29                                                        | 18.84  | 0.00      | 15.28   |
| AST14DEM_00305282007054024 | 2007/5/28  | 6.71                                                          | 15.00  | 1.75      | 11.23   |
| AST14DEM_00305282007054033 | 2007/5/28  | 2.53                                                          | 17.41  | 1.20      | 12.86   |
| AST14DEM_00307312007054050 | 2007/7/31  | 5.20                                                          | 13.02  | 0.24      | 10.64   |
| AST14DEM_00307312007054059 | 2007/7/31  | -6.05                                                         | 18.55  | 0.69      | 15.64   |
| AST14DEM_00312222007054044 | 2007/12/22 | 6.90                                                          | 29.90  | 1.93      | 28.56   |
| AST14DEM_00312222007054035 | 2007/12/22 | 6.46                                                          | 26.46  | 1.37      | 24.60   |
| AST14DEM_00303112008054024 | 2008/3/11  | 4.45                                                          | 18.47  | 1.08      | 17.80   |
| AST14DEM_00310212008054055 | 2008/10/21 | 11.45                                                         | 28.96  | 0.82      | 23.80   |
| AST14DEM_00310212008054046 | 2008/10/21 | 11.12                                                         | 28.09  | 1.04      | 22.37   |
| AST14DEM_00311222008054054 | 2008/11/22 | 5.03                                                          | 23.19  | 1.98      | 17.44   |
| AST14DEM_00311222008054103 | 2008/11/22 | -3.23                                                         | 19.74  | 0.31      | 12.30   |
| AST14DEM_00304222009054745 | 2009/4/22  | 0.03                                                          | 15.73  | -0.10     | 14.64   |
| AST14DEM_00308212009054049 | 2009/8/21  | 14.17                                                         | 24.23  | 1.24      | 24.45   |
| AST14DEM_00310312009054651 | 2009/10/31 | -3.46                                                         | 12.39  | -0.54     | 12.36   |
| AST14DEM_00312022009054657 | 2009/12/2  | -6.68                                                         | 10.84  | 0.23      | 10.22   |
| AST14DEM_00302042010054646 | 2010/2/4   | 2.40                                                          | 14.57  | -0.23     | 12.96   |
| AST14DEM_00304092010054648 | 2010/4/9   | 0.03                                                          | 11.52  | -0.16     | 11.23   |
| AST14DEM_00309162010054631 | 2010/9/16  | -8.04                                                         | 17.04  | -0.13     | 12.49   |
| AST14DEM_00301312011054004 | 2011/1/31  | 0.92                                                          | 36.48  | 1.77      | 36.12   |
| AST14DEM_00305072011054026 | 2011/5/7   | -0.48                                                         | 15.62  | 1.01      | 11.47   |
| AST14DEM_00305072011054035 | 2011/5/7   | -2.42                                                         | 15.77  | 1.06      | 11.41   |
| AST14DEM_00306082011054011 | 2011/6/8   | 1.83                                                          | 16.35  | 0.50      | 10.75   |
| AST14DEM_00306082011054020 | 2011/6/8   | -2.75                                                         | 18.02  | 0.56      | 11.64   |
| AST14DEM_00306242011054010 | 2011/6/24  | 7.34                                                          | 10.86  | 1.29      | 9.87    |
| AST14DEM_00306242011054019 | 2011/6/24  | 4.86                                                          | 12.41  | 0.33      | 11.58   |
| AST14DEM_00303222012054024 | 2012/3/22  | 16.38                                                         | 17.56  | 0.76      | 15.25   |
| AST14DEM_00304142012054630 | 2012/4/14  | 4.44                                                          | 11.84  | 0.41      | 11.79   |
| AST14DEM_00304232012054026 | 2012/4/23  | 24.70                                                         | 23.33  | 1.03      | 16.94   |
| AST14DEM_00304232012054035 | 2012/4/23  | 19.87                                                         | 22.19  | 0.35      | 14.93   |
| AST14DEM_00305092012054029 | 2012/5/9   | 21.51                                                         | 14.29  | 1.38      | 13.97   |
| AST14DEM_00305162012054638 | 2012/5/16  | -3.95                                                         | 12.40  | 0.80      | 12.29   |
| AST14DEM_00307032012054636 | 2012/7/3   | 1.64                                                          | 19.03  | 0.40      | 13.05   |
| AST14DEM_00310192013054017 | 2013/10/19 | 9.86                                                          | 25.58  | 1.12      | 25.53   |
| AST14DEM_00310192013054025 | 2013/10/19 | 5.59                                                          | 27.38  | 0.90      | 26.71   |
| AST14DEM_00308192014054100 | 2014/8/19  | 2.97                                                          | 13.11  | 1.01      | 11.09   |
| AST14DEM_00308192014054109 | 2014/8/19  | -4.98                                                         | 14.77  | 0.28      | 12.40   |
| AST14DEM_00302112015054102 | 2015/2/11  | -2.36                                                         | 21.49  | 1.39      | 20.93   |
| AST14DEM_00309142015054723 | 2015/9/14  | -2.57                                                         | 12.25  | 0.01      | 10.97   |
| AST14DEM_00312032015054715 | 2015/12/3  | -17.06                                                        | 16.33  | -0.38     | 14.08   |
| AST14DEM_00303082016054644 | 2016/3/8   | -16.31                                                        | 12.62  | -0.31     | 11.00   |
| AST14DEM_00303242016054647 | 2016/3/24  | -5.15                                                         | 11.16  | -0.50     | 10.43   |
| AST14DEM_00305142017054652 | 2017/5/14  | -5.32                                                         | 15.79  | 1.04      | 13.02   |
| AST14DEM_00305302017054652 | 2017/5/30  | 0.33                                                          | 20.98  | 0.40      | 19.87   |
| AST14DEM_00312082017054653 | 2017/12/8  | -1.81                                                         | 10.84  | 0.01      | 10.42   |

|                                                                  |            |        |       |       |       |
|------------------------------------------------------------------|------------|--------|-------|-------|-------|
| AST14DEM_00305262018054155                                       | 2018/5/26  | 22.87  | 24.62 | 1.13  | 14.22 |
| AST14DEM_00305262018054204                                       | 2018/5/26  | 14.89  | 27.46 | 0.71  | 16.47 |
| AST14DEM_00305292019054059                                       | 2019/5/29  | -1.98  | 18.08 | 1.20  | 12.09 |
| AST14DEM_00305292019054050                                       | 2019/5/29  | 2.63   | 16.05 | 0.88  | 11.48 |
| AST14DEM_00303032020054720                                       | 2020/3/3   | -8.20  | 14.70 | 0.50  | 14.35 |
| AST14DEM_00306232020054643                                       | 2020/6/23  | 1.14   | 20.40 | 0.02  | 14.60 |
| AST14DEM_00305092021054453                                       | 2021/5/9   | 1.55   | 21.98 | 0.69  | 17.79 |
| AST14DEM_00306032021053822                                       | 2021/6/3   | 16.57  | 28.27 | 1.28  | 14.69 |
| AST14DEM_00306032021053813                                       | 2021/6/3   | 20.22  | 22.54 | 1.43  | 12.48 |
| AST14DEM_00309302021054225                                       | 2021/9/30  | 6.90   | 19.68 | -0.04 | 11.82 |
| HMA_DEM8m_AT_20110625_0602_1030<br>01000B995100_103001000B62DE00 | 2011/6/25  | -21.73 | 6.68  | 0.16  | 6.30  |
| HMA_DEM8m_AT_20110625_0602_1030<br>01000C6D7F00_103001000B48A500 | 2011/6/25  | -18.74 | 6.38  | 0.11  | 5.95  |
| HMA_DEM8m_AT_20120817_0555_1030<br>01001ABA5800_103001001BA72400 | 2012/8/17  | -18.02 | 6.30  | 0.07  | 6.05  |
| HMA_DEM8m_AT_20121002_0548_1020<br>01001D519C00_102001001E5C8700 | 2012/10/2  | -14.60 | 6.84  | 0.13  | 6.59  |
| HMA_DEM8m_AT_20130121_0537_1020<br>01001E3AD500_102001001FD84200 | 2013/1/21  | -17.77 | 6.82  | 0.31  | 6.53  |
| HMA_DEM8m_AT_20150321_0533_1040<br>01000970E100_1040010009200000 | 2015/3/21  | -18.94 | 6.08  | 0.23  | 5.67  |
| HMA_DEM8m_AT_20150409_0533_1040<br>01000A61D300_104001000A3BBC00 | 2015/4/9   | -17.71 | 6.07  | 0.25  | 5.81  |
| HMA_DEM8m_AT_20150409_0534_1040<br>01000A8D7900_104001000955A900 | 2015/4/9   | -17.65 | 5.55  | 0.17  | 5.33  |
| HMA_DEM8m_AT_20150507_0542_1050<br>410012A5C000_1050410012A5BF00 | 2015/5/7   | -19.05 | 6.97  | 0.14  | 6.33  |
| HMA_DEM8m_AT_20150523_0550_1030<br>010042AEB200_103001004177F700 | 2015/5/23  | -23.14 | 6.09  | 0.09  | 5.81  |
| HMA_DEM8m_AT_20151016_0545_1040<br>010012C70E00_104001001380D500 | 2015/10/16 | -16.88 | 6.34  | 0.22  | 5.79  |
| HMA_DEM8m_AT_20151128_0742_1020<br>0100481CBF00_10200100470C5800 | 2015/11/28 | -21.61 | 8.16  | -0.07 | 7.56  |
| HMA_DEM8m_AT_20160730_0547_1030<br>010058028600_103001005A695500 | 2016/7/30  | -19.06 | 6.34  | 0.13  | 6.10  |
| HMA_DEM8m_AT_20161002_0535_1050<br>010006818700_1050010006818900 | 2016/10/2  | -18.07 | 5.97  | 0.04  | 5.54  |
| HMA_DEM8m_AT_20161002_0534_1050<br>010006818800_1050010006818600 | 2016/10/2  | -19.26 | 6.36  | 0.23  | 5.79  |
| HMA_DEM8m_CT_20141025_1736_1040<br>010003AC5200_10300100388CC800 | 2014/10/25 | -12.47 | 6.81  | 0.09  | 6.57  |
| HMA_DEM8m_CT_20141129_1801_1030<br>01003CC3F400_1020010038C4A900 | 2014/11/29 | -18.49 | 6.56  | 0.18  | 6.12  |



**Figure S1.** Sharpened Landsat images showing ice-dammed lake evolution (1).

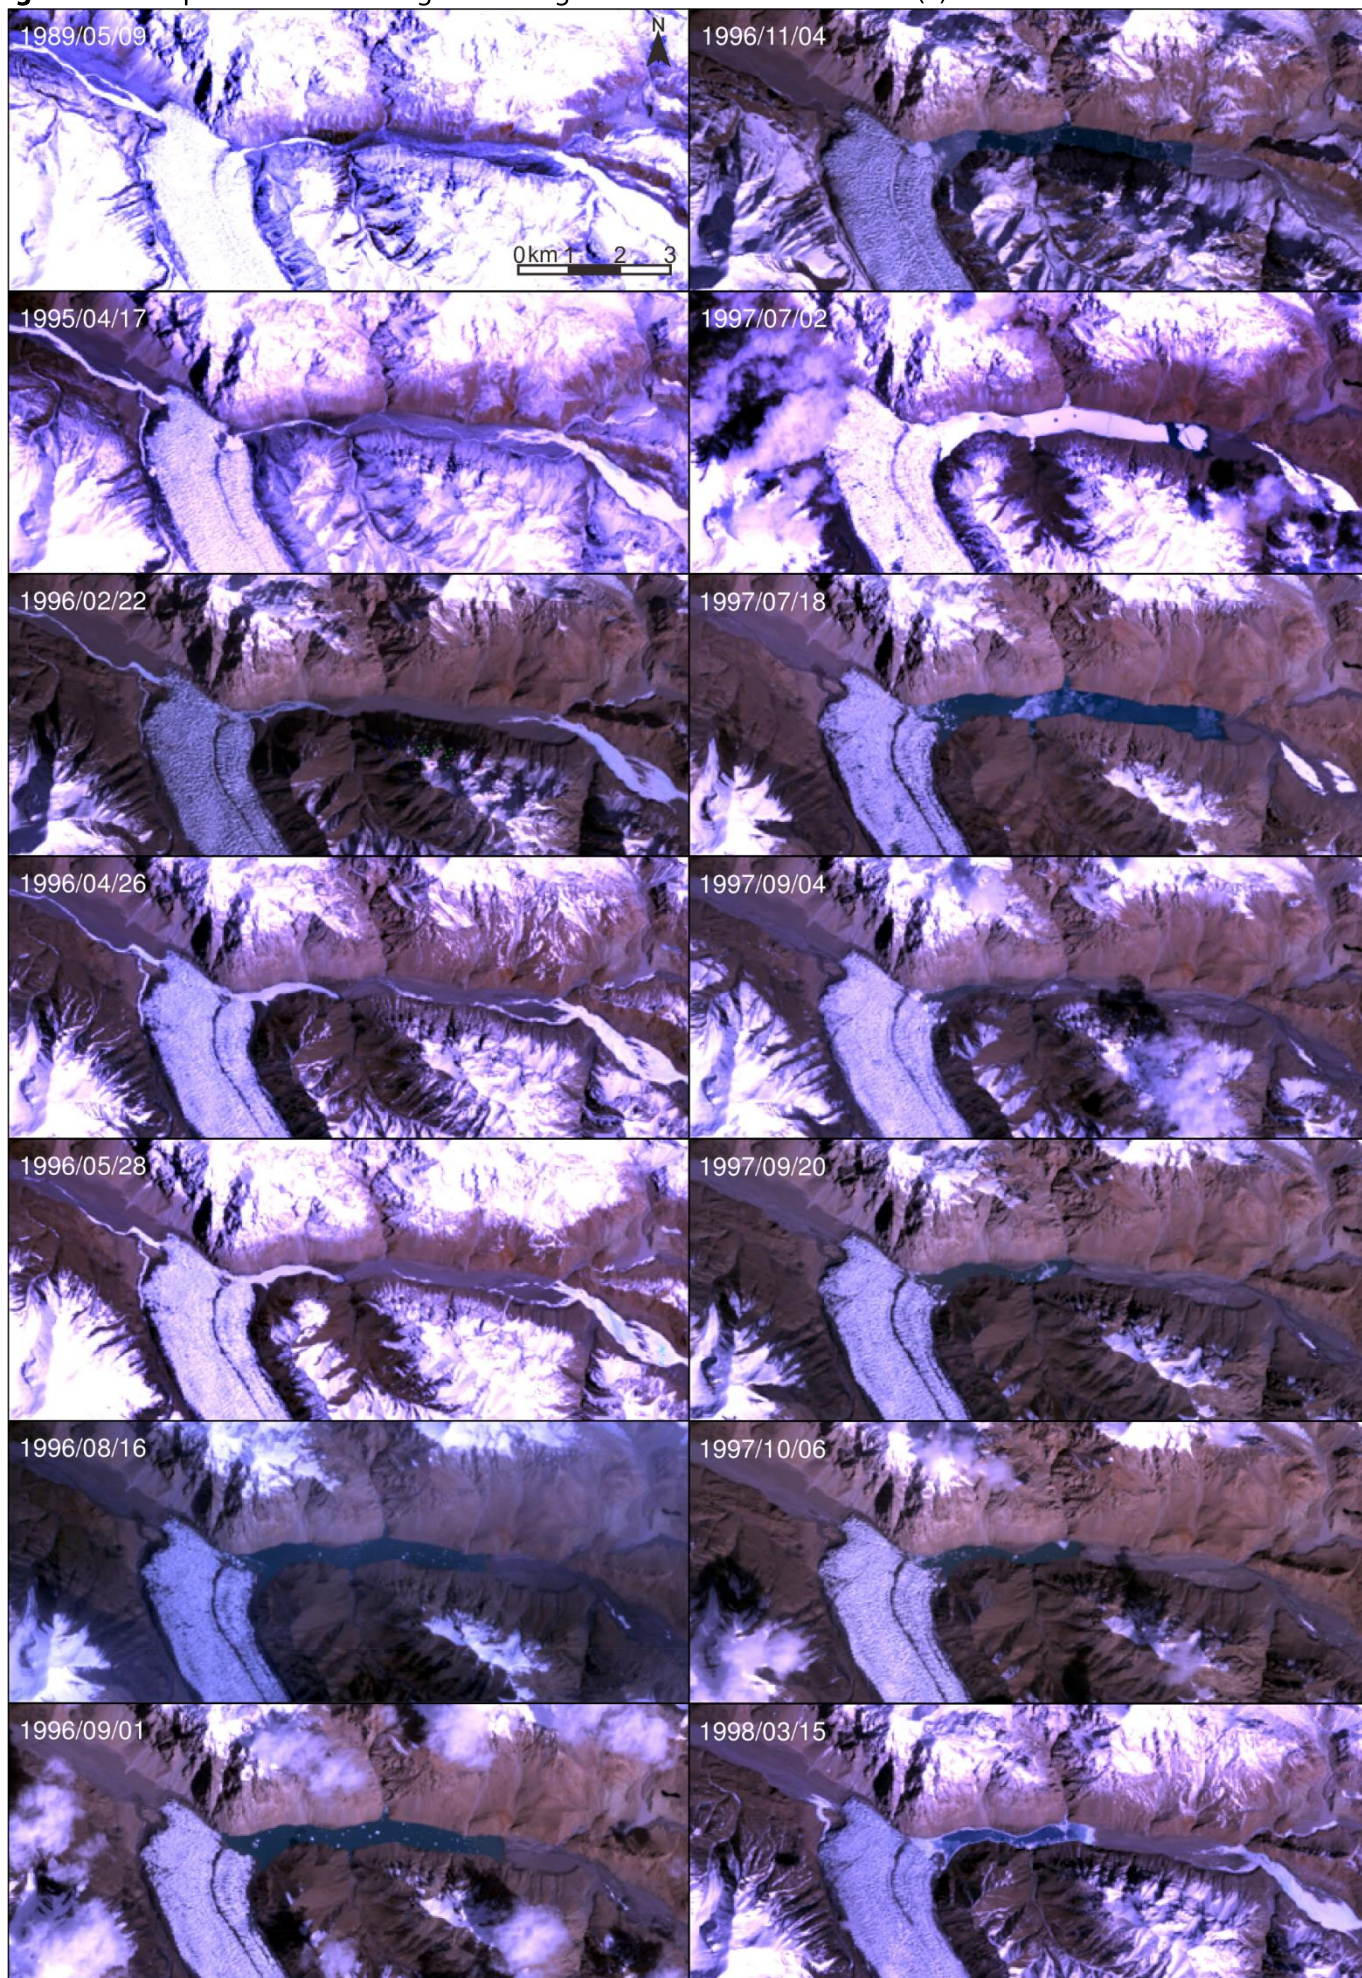



**Figure S2.** Sharpened Landsat images showing ice-dammed lake evolution (2).

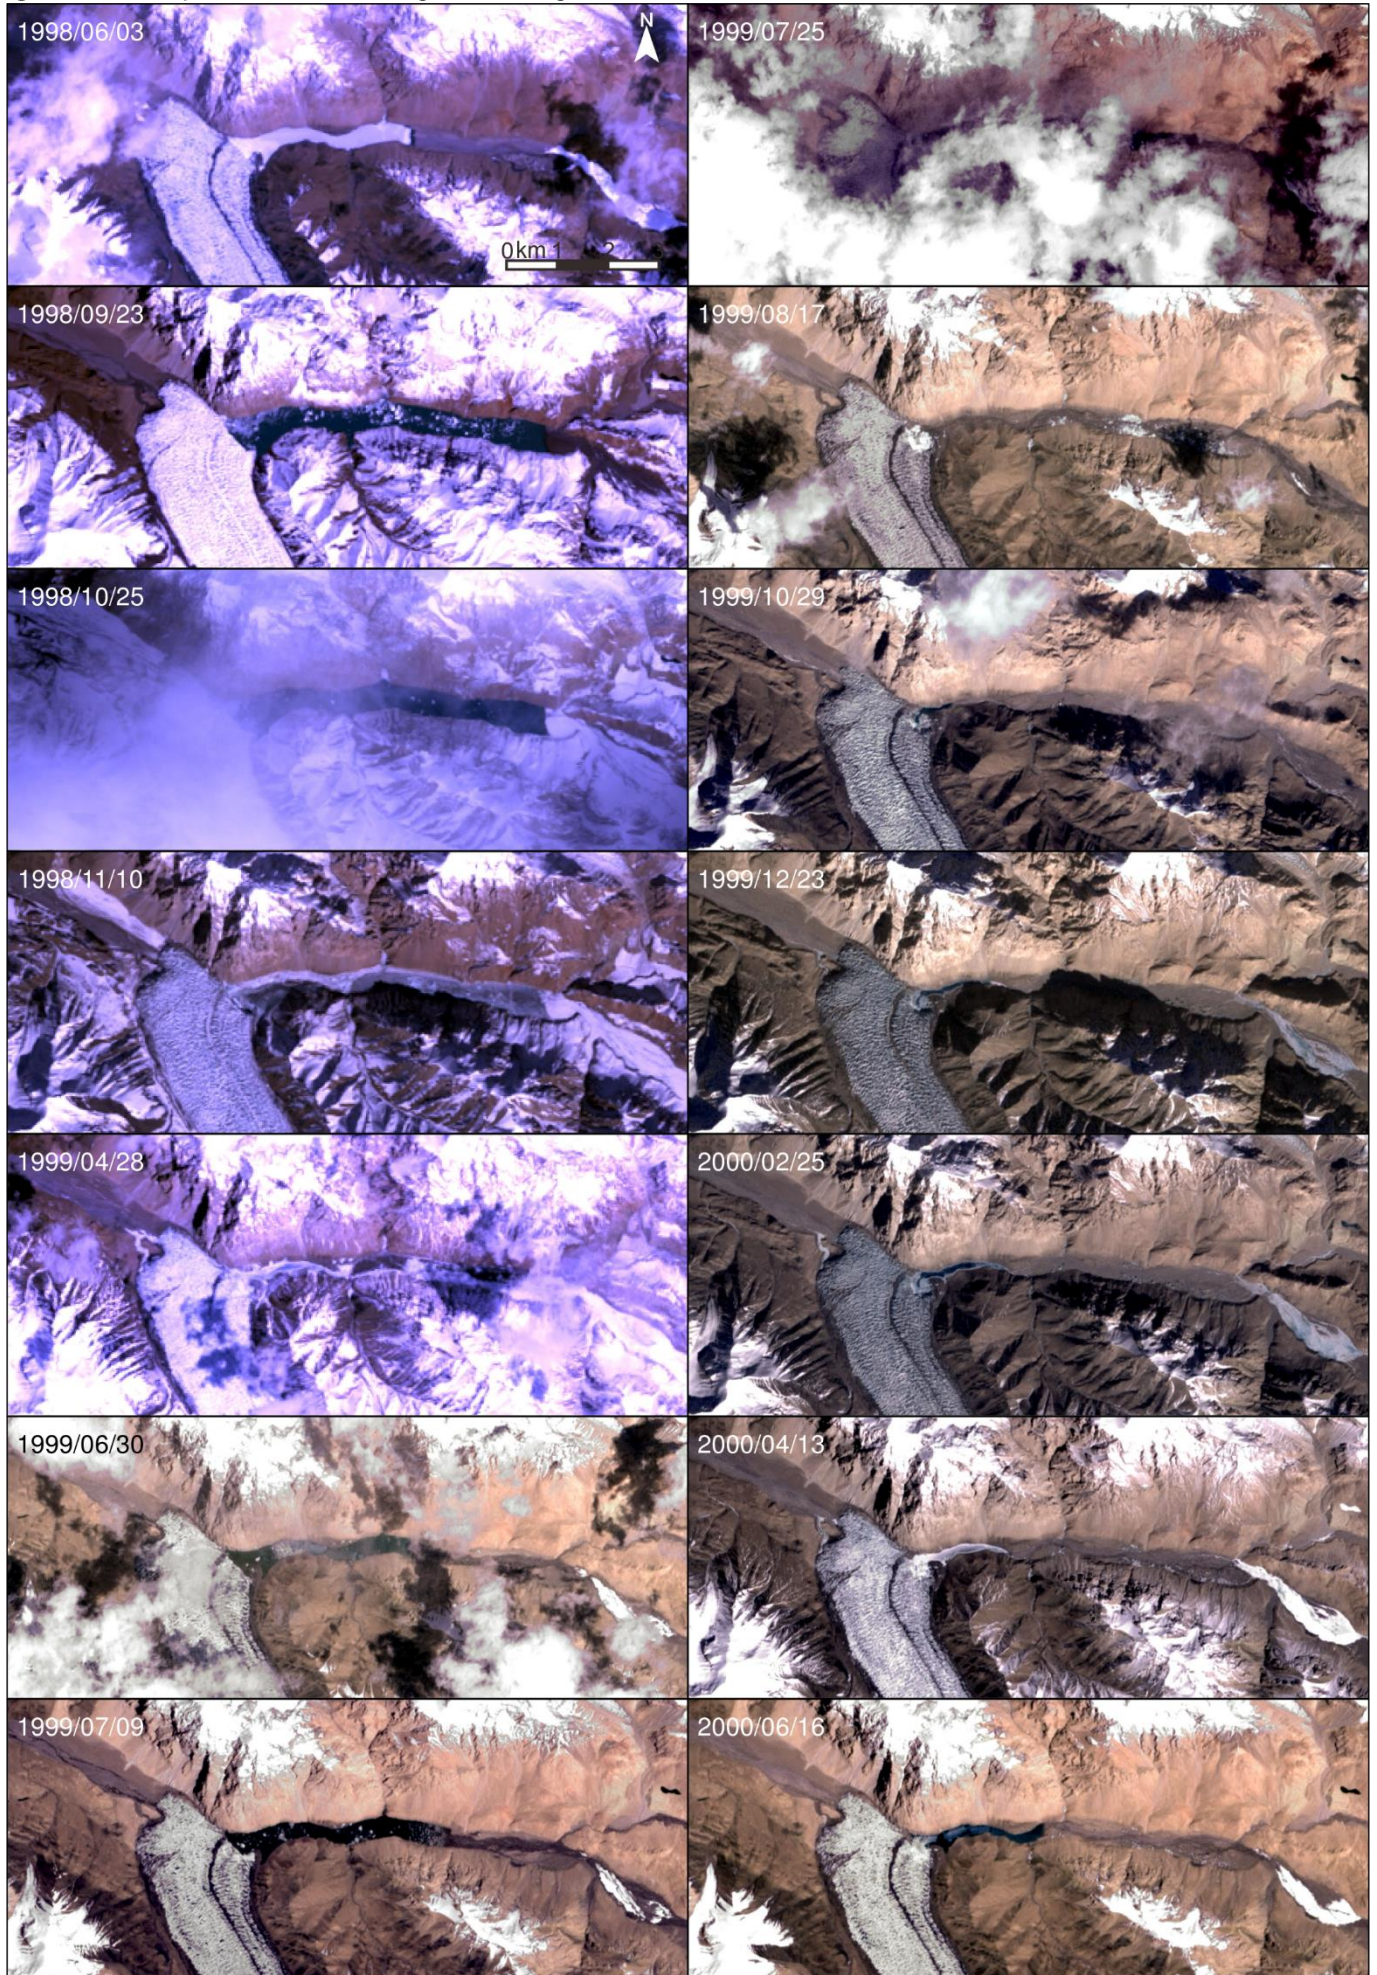



**Figure S3.** Sharpened Landsat images showing ice-dammed lake evolution (3).

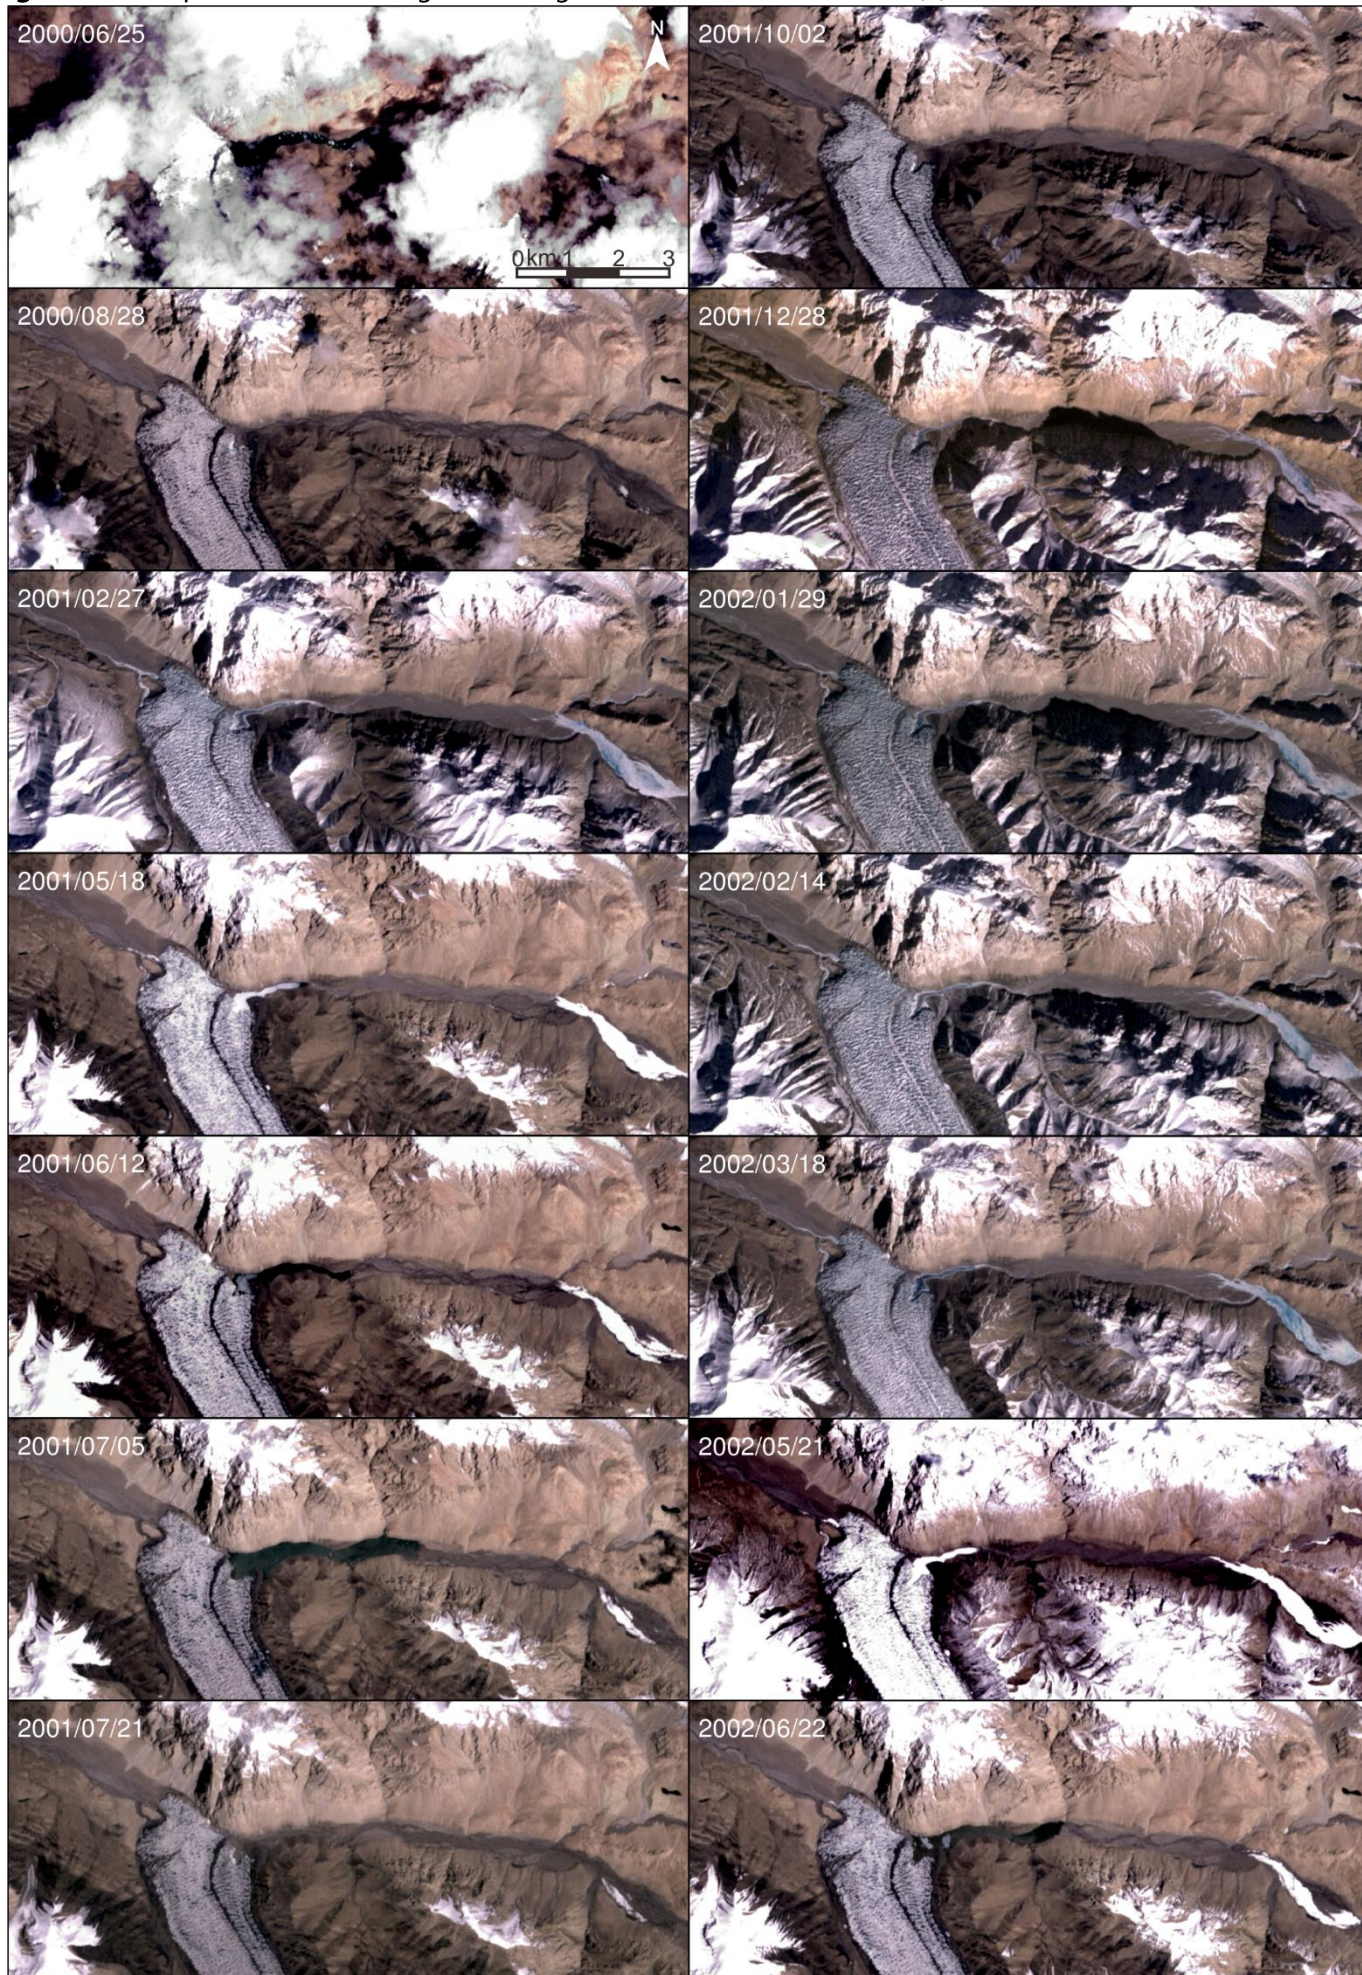



**Figure S4.** Sharpened Landsat images showing ice-dammed lake evolution (4).

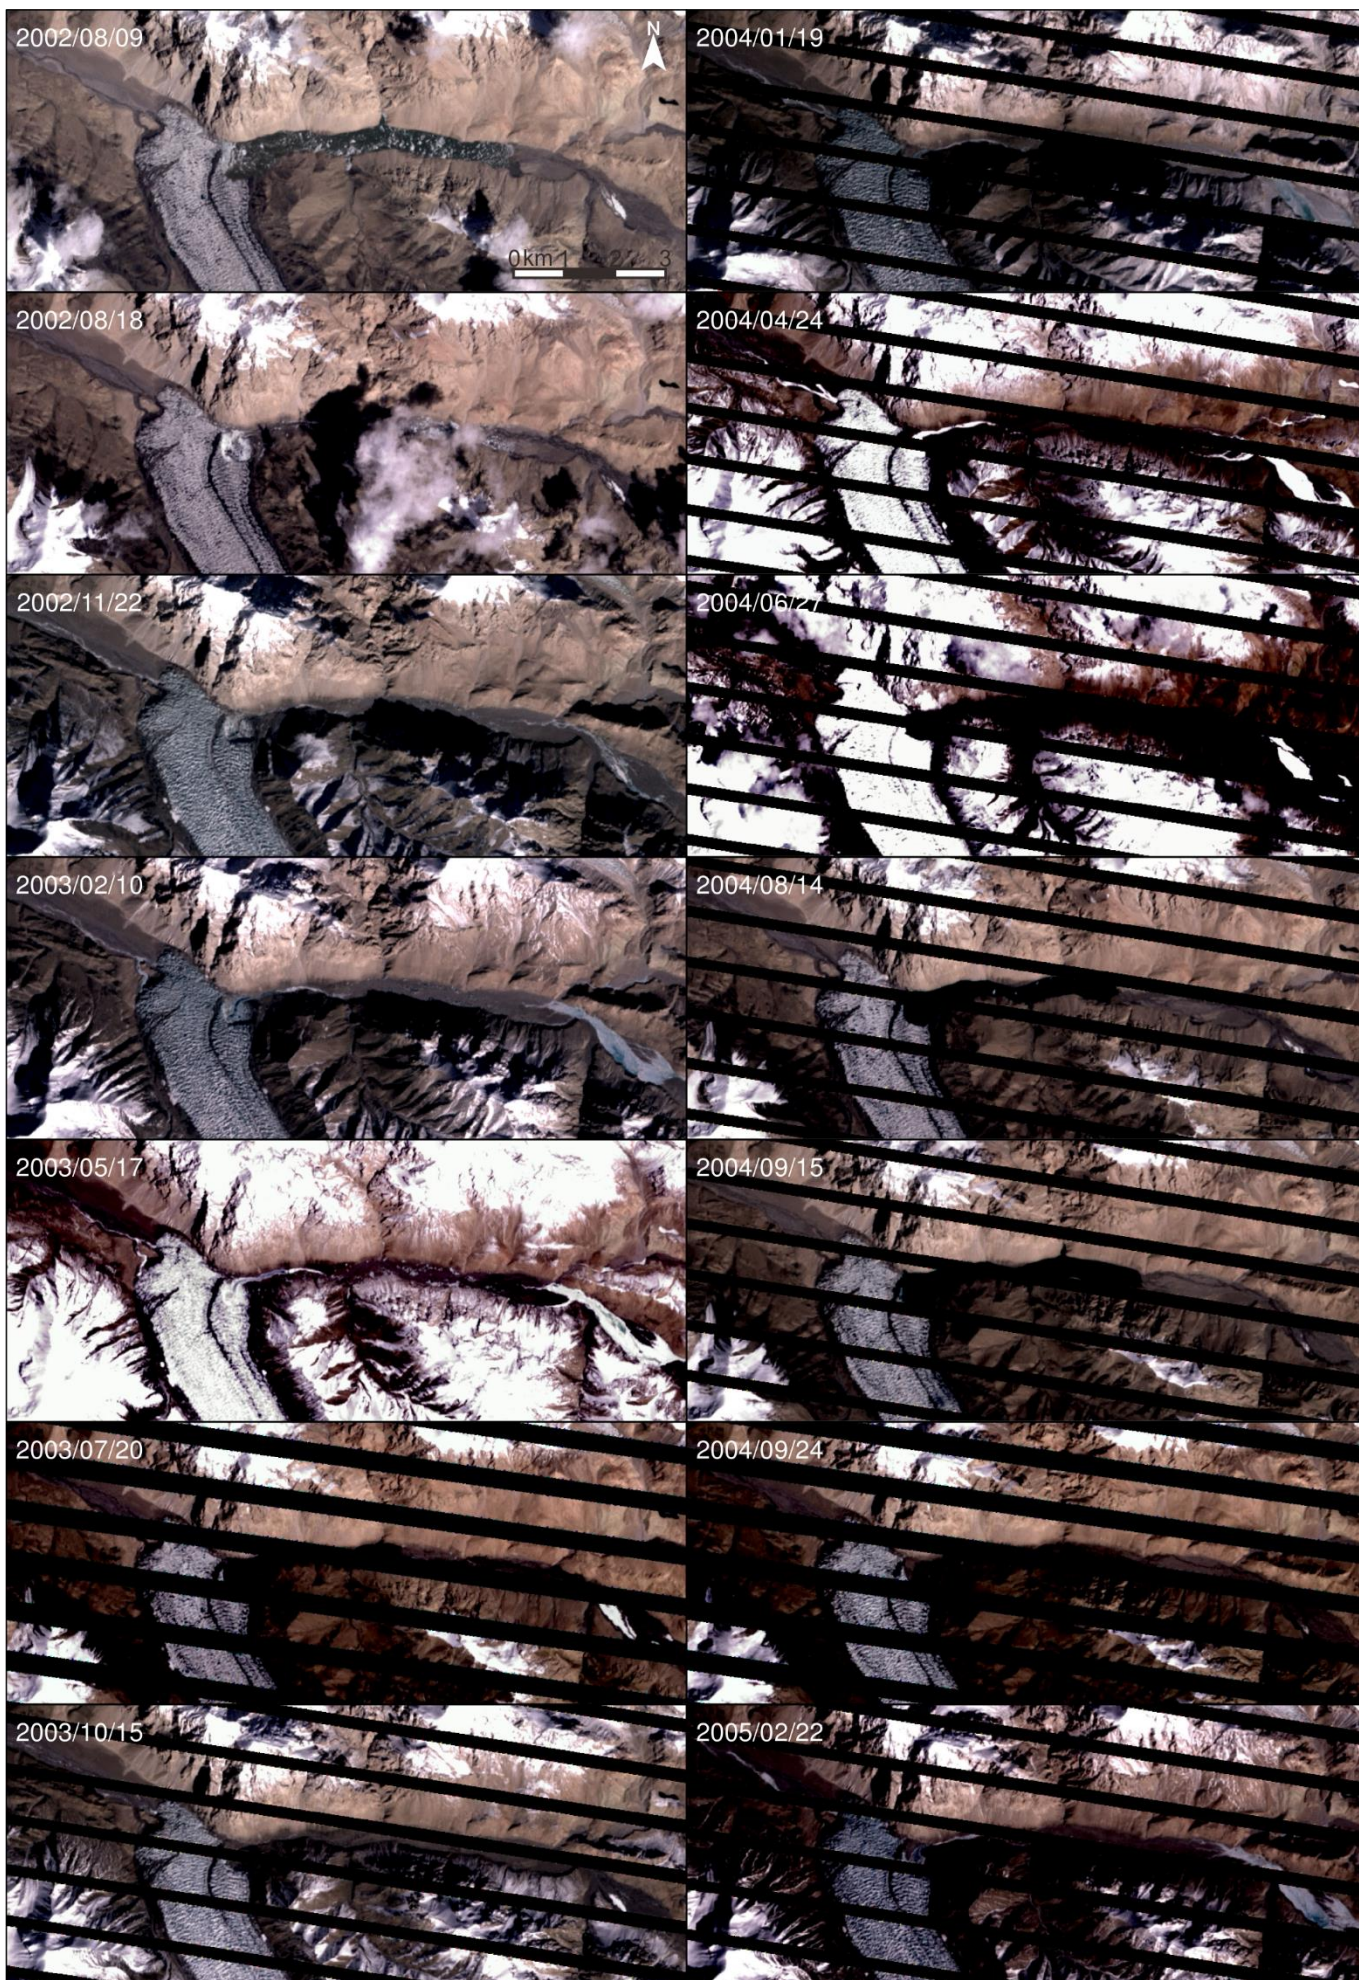



**Figure S5.** Sharpened Landsat images showing ice-dammed lake evolution (5).

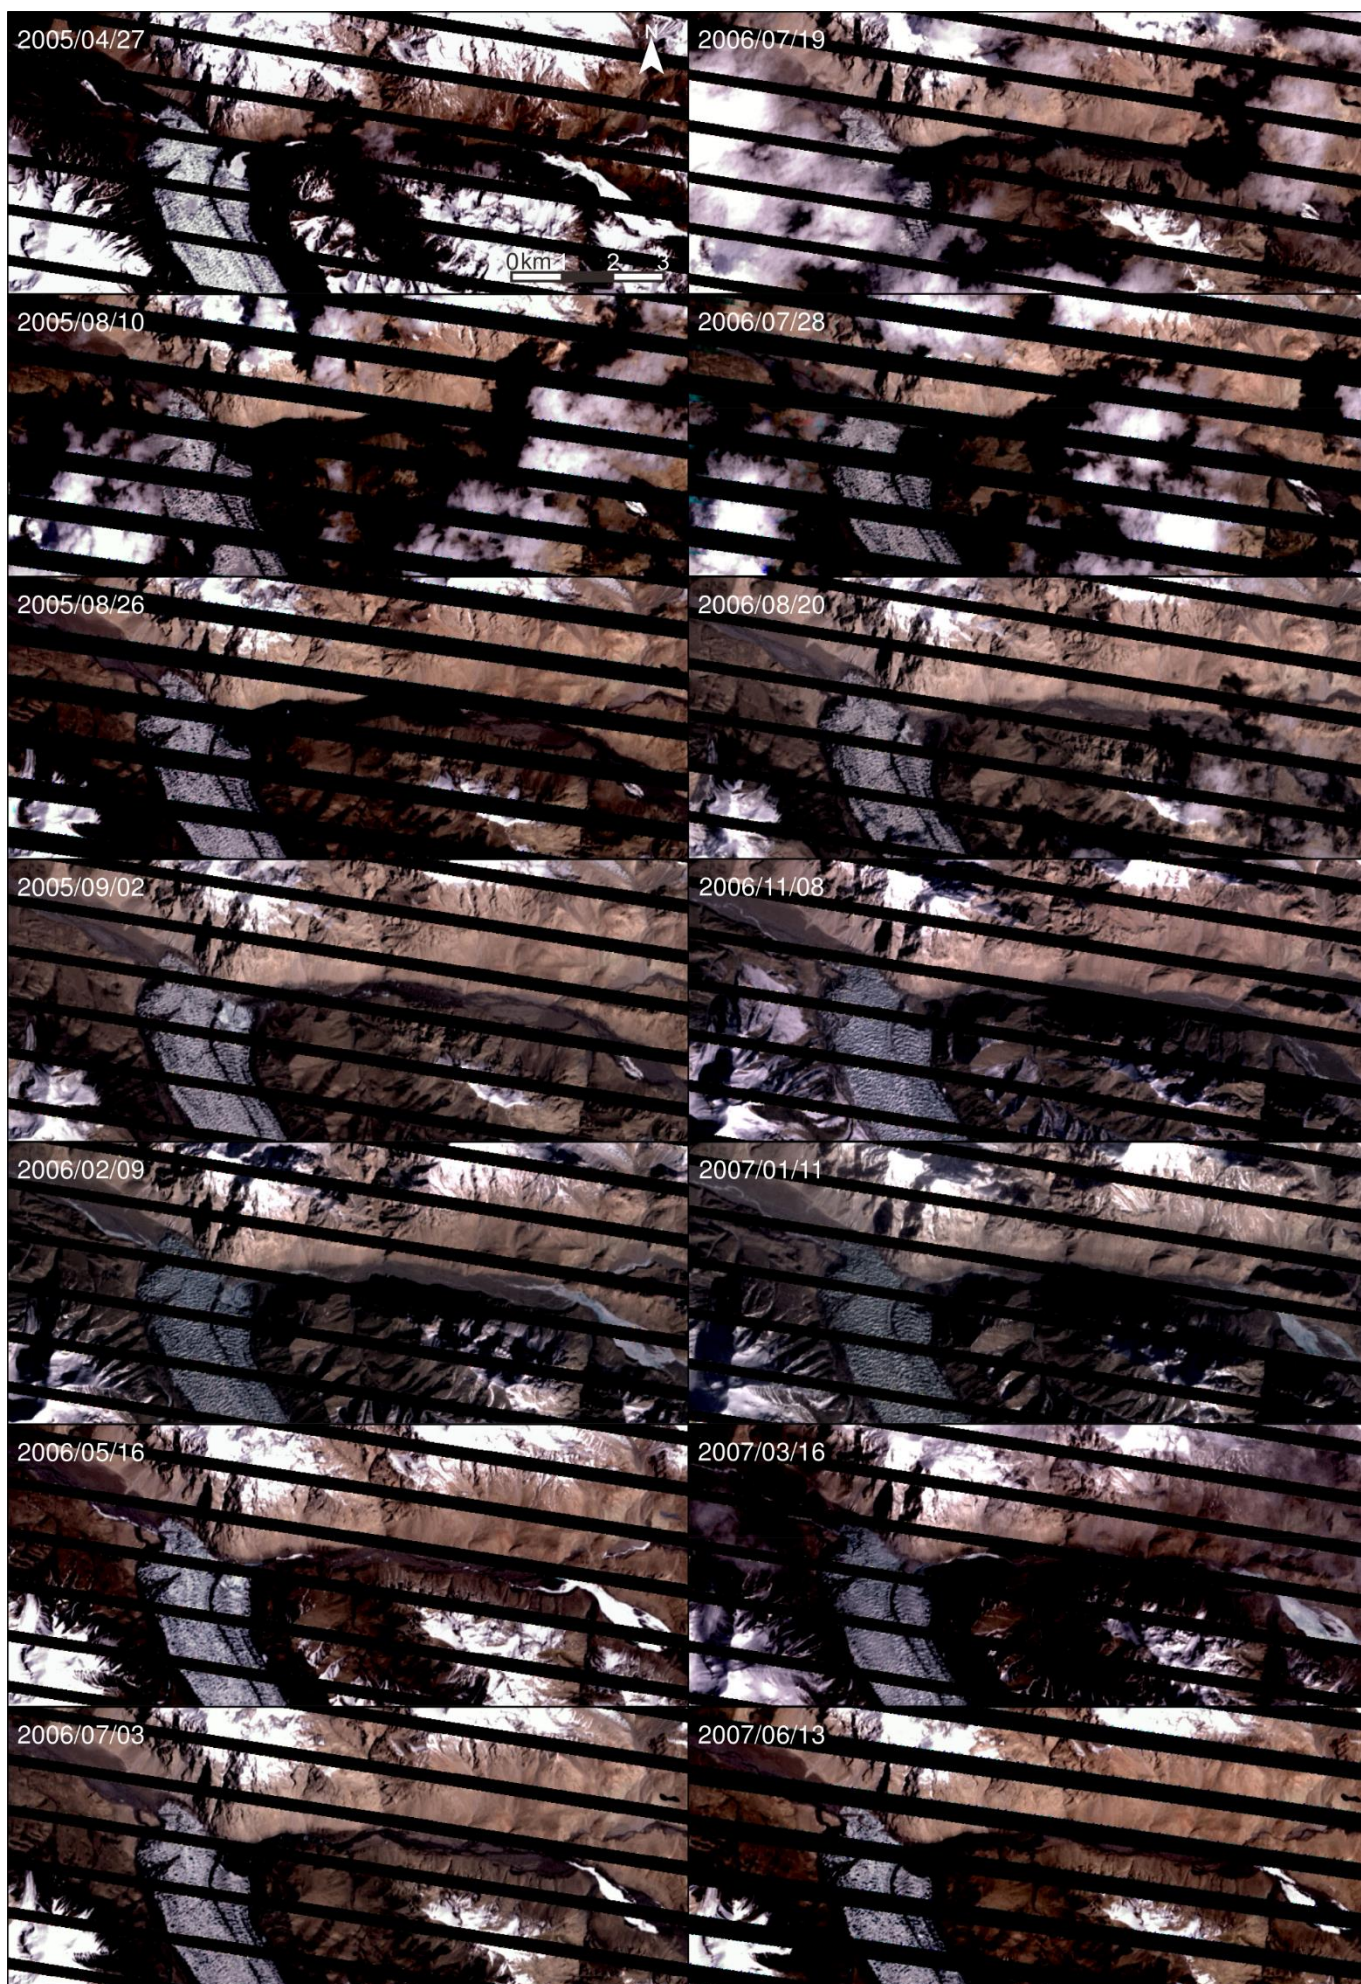



**Figure S6.** Sharpened Landsat images showing ice-dammed lake evolution (6).

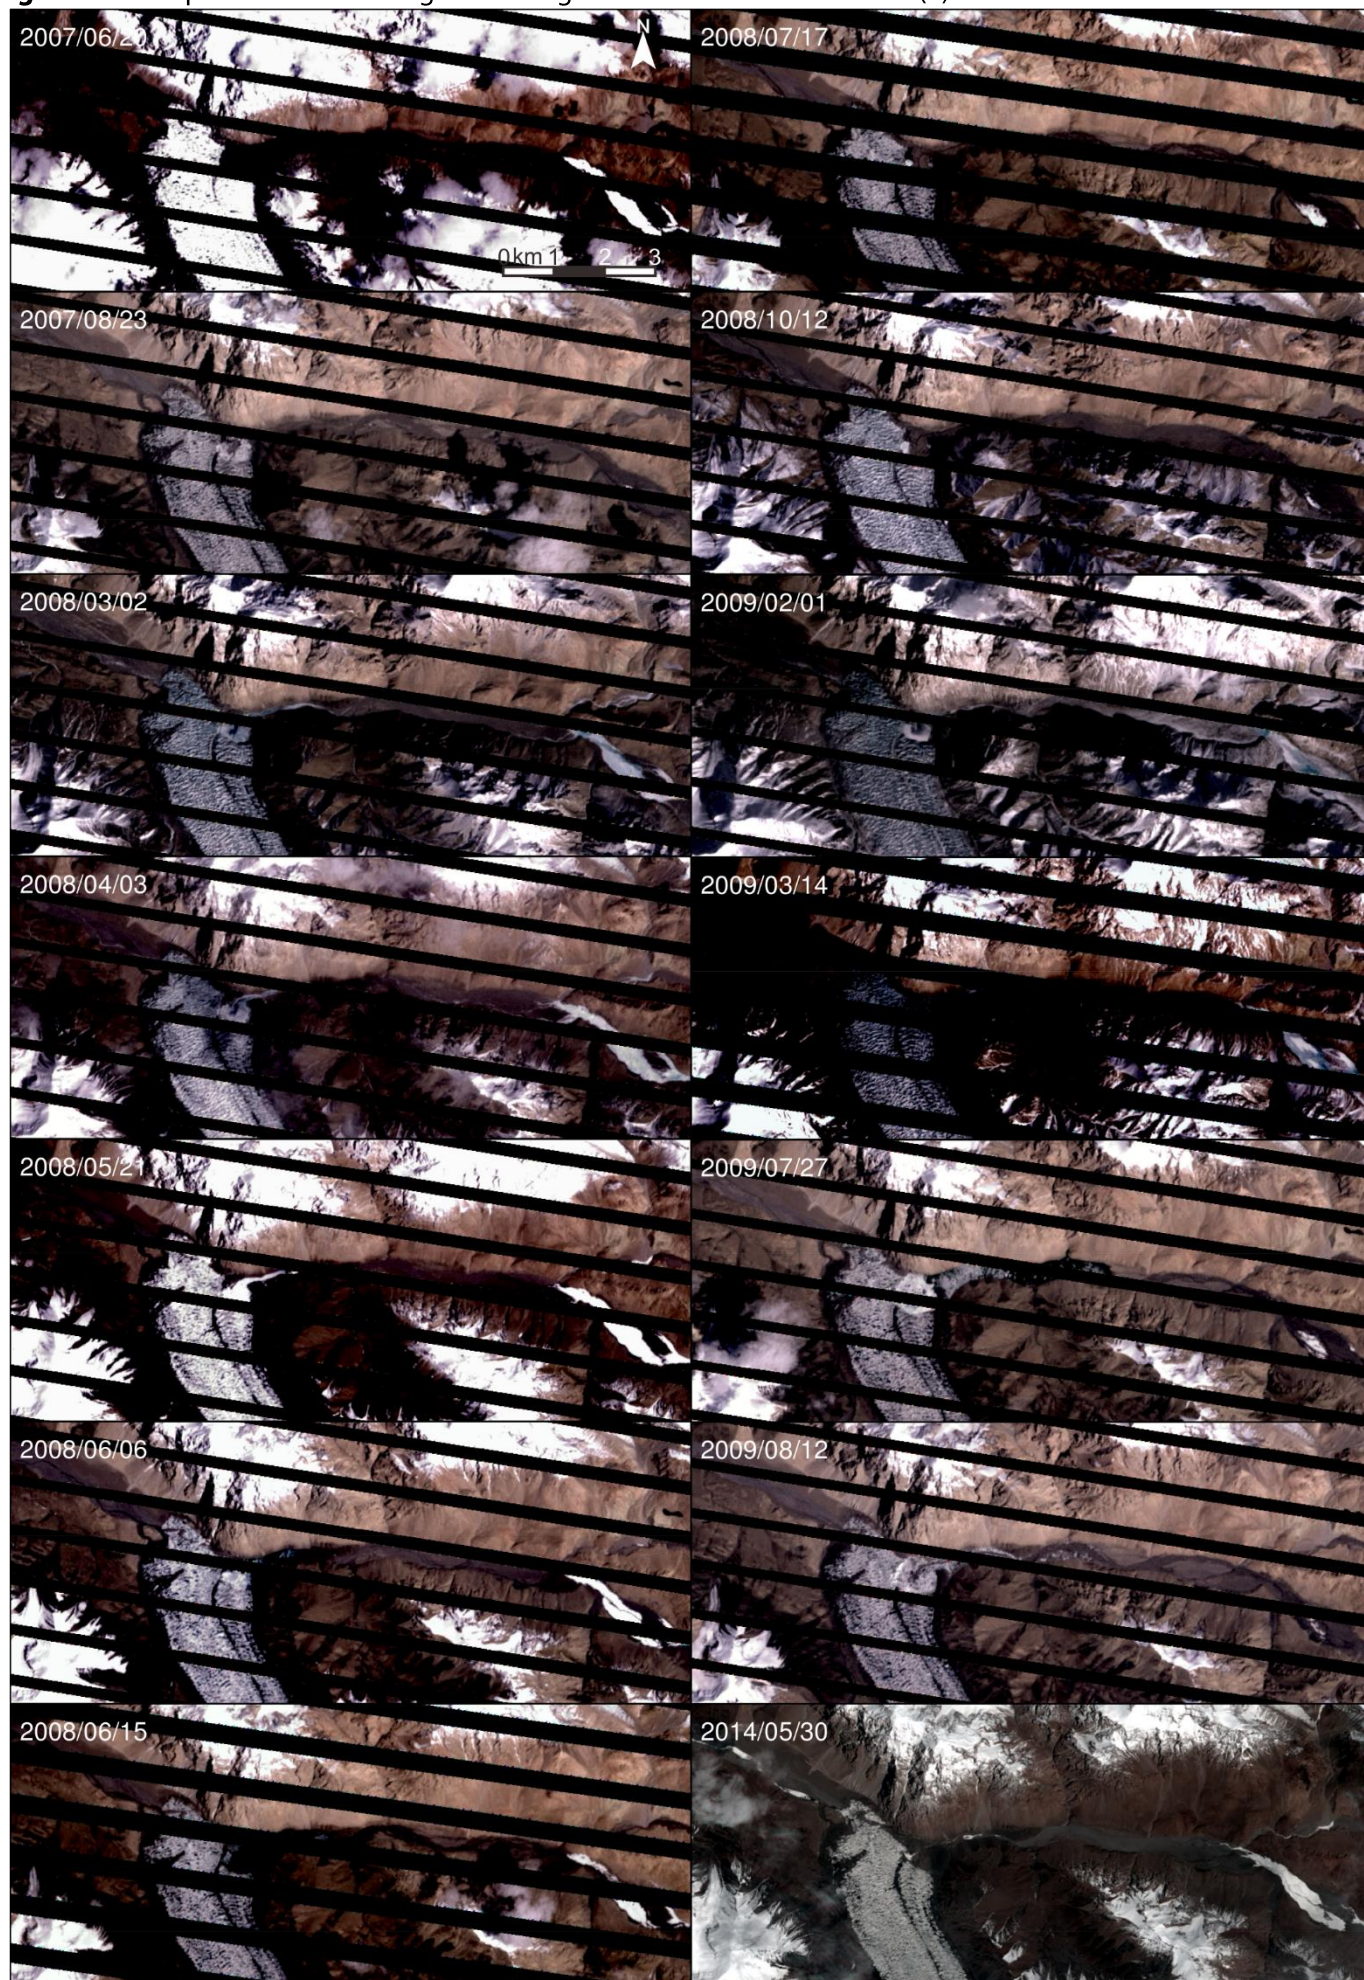



**Figure S7.** Sharpened Landsat images showing ice-dammed lake evolution (7).

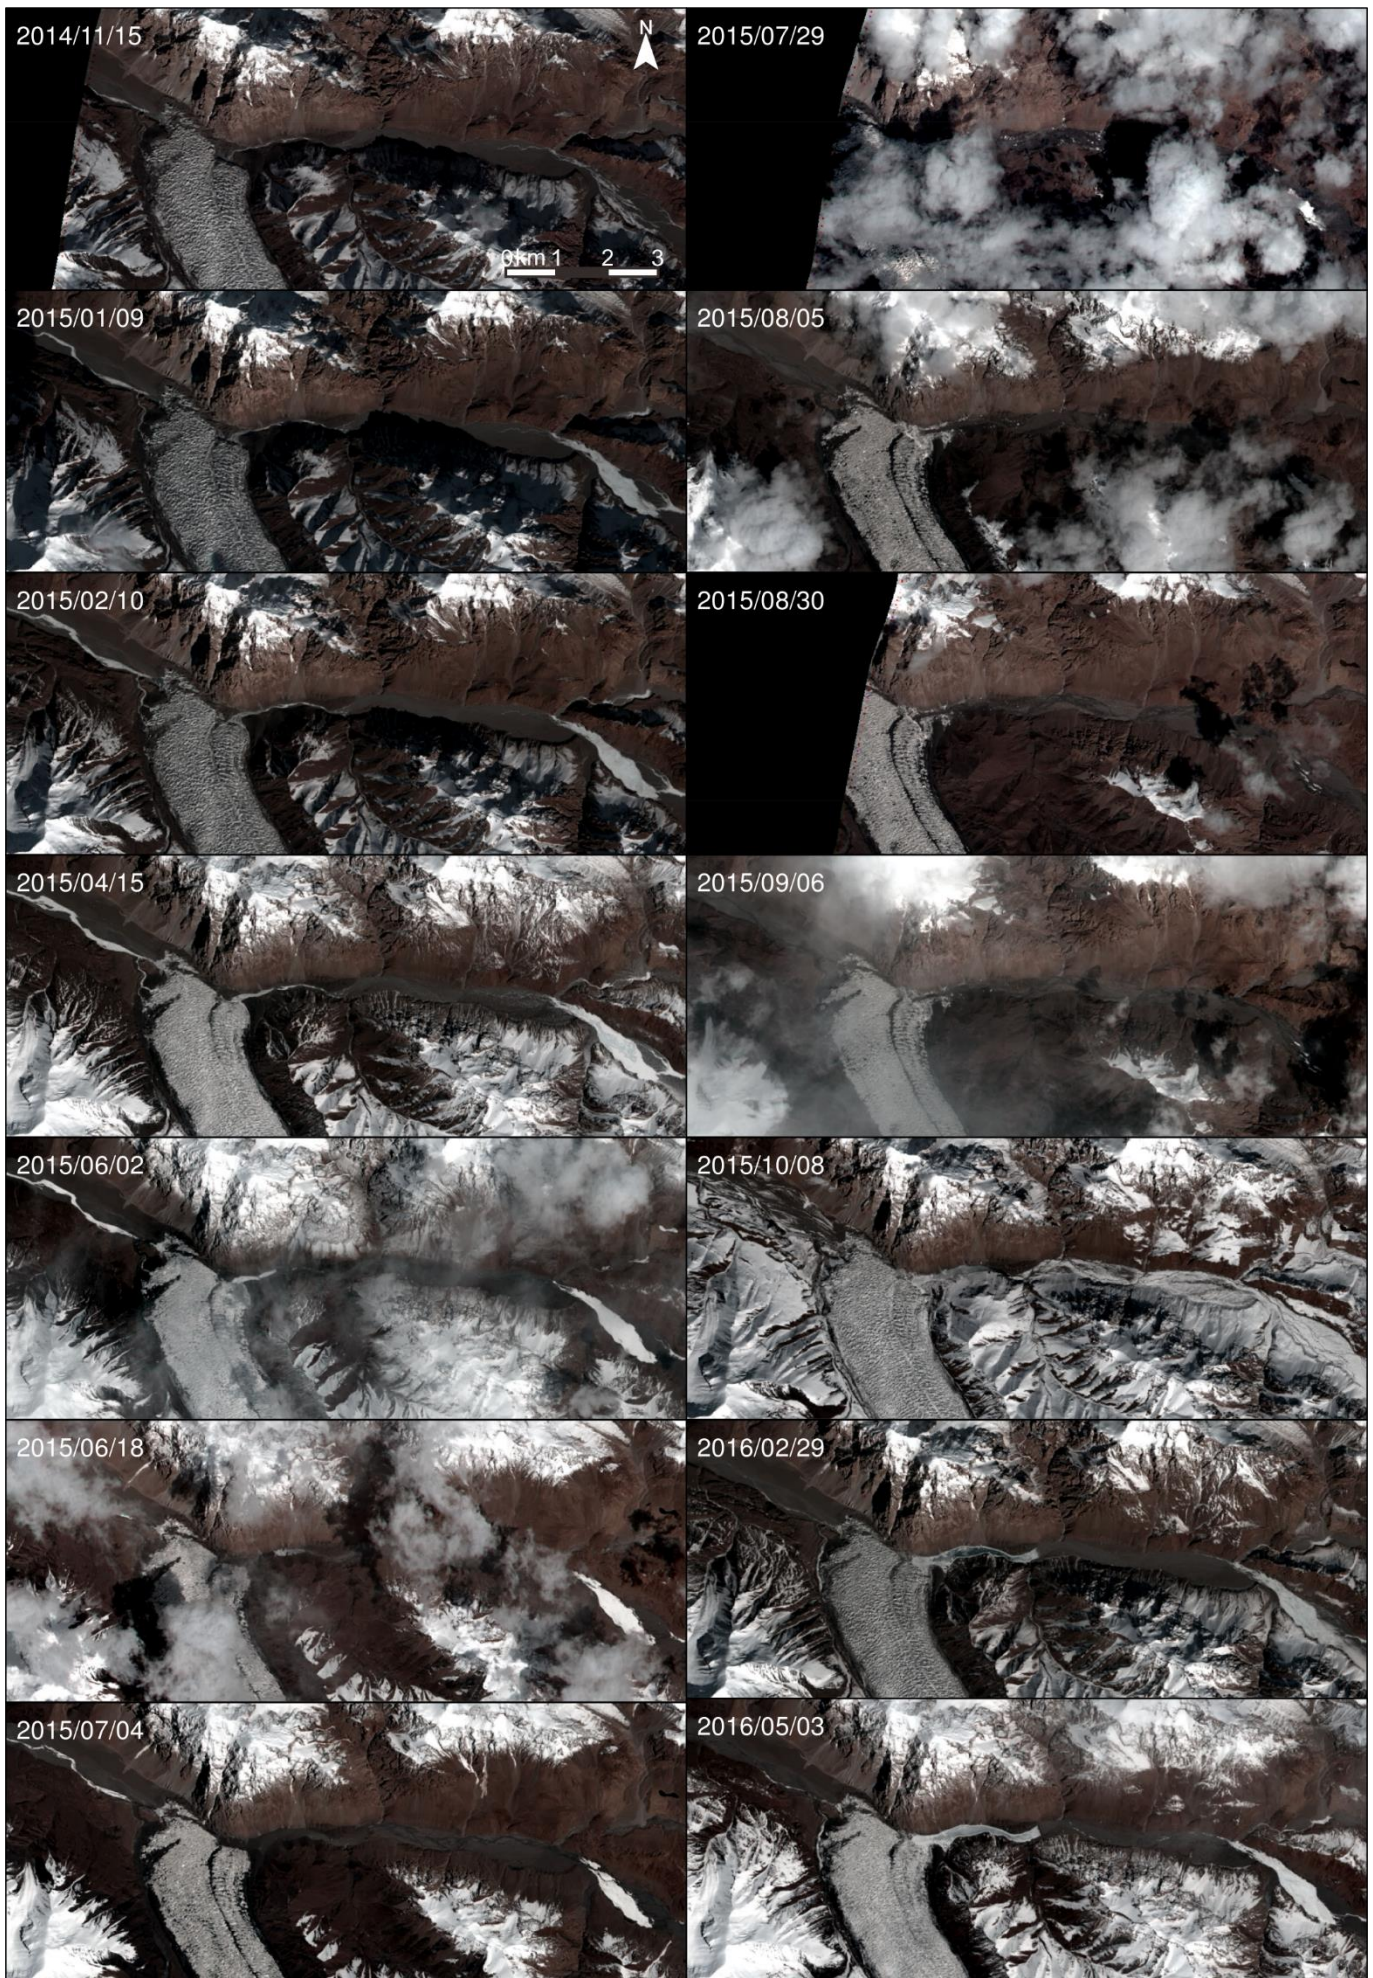



**Figure S8.** Sharpened Landsat images showing ice-dammed lake evolution (8).

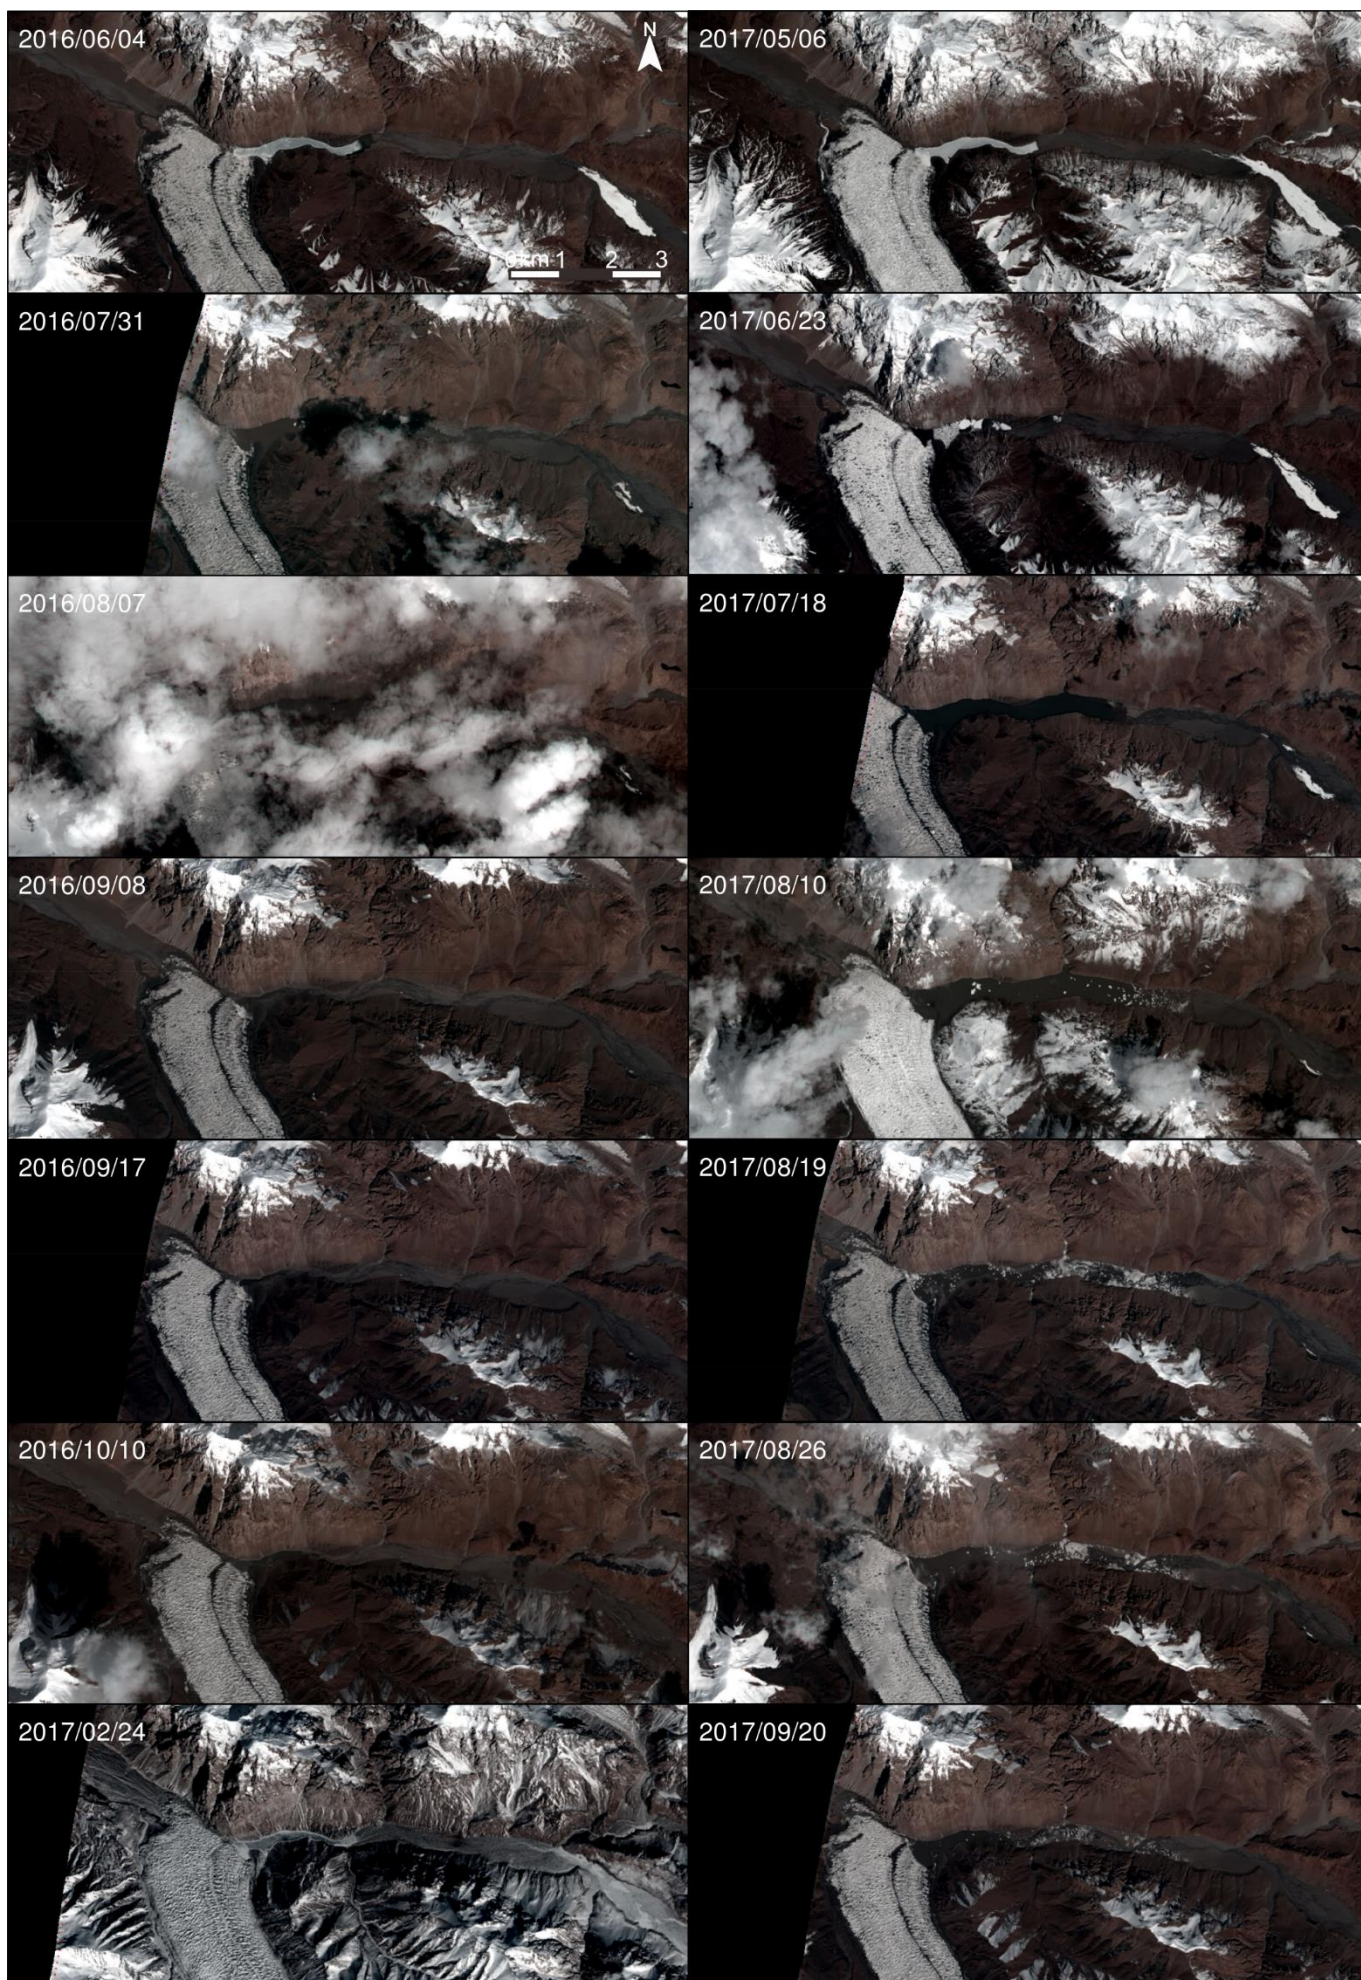



**Figure S9.** Sharpened Landsat images showing ice-dammed lake evolution (9).

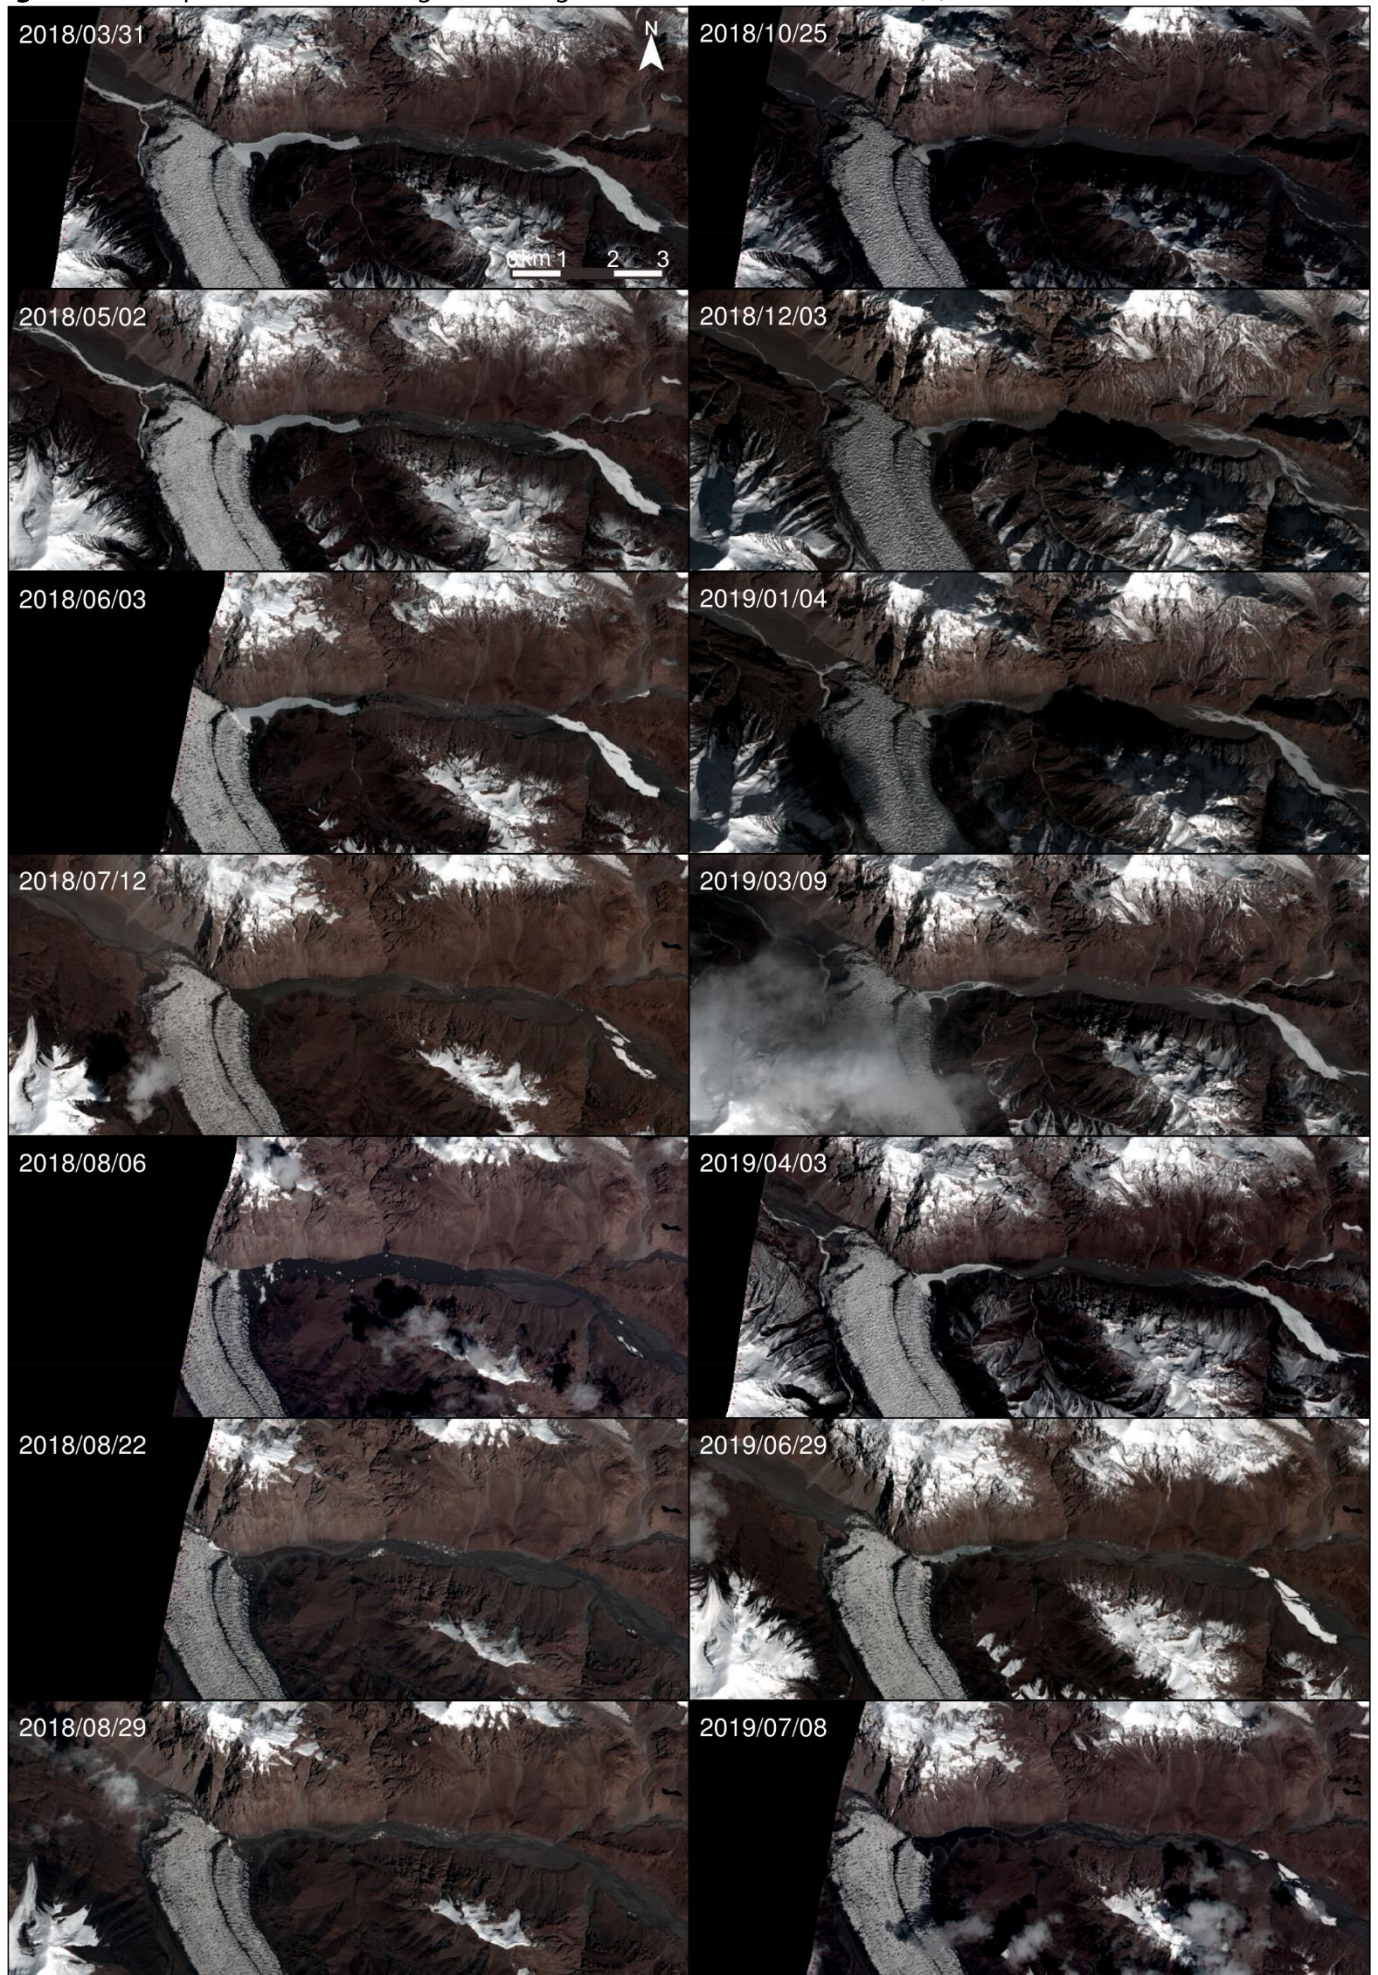



**Figure S10.** Sharpened Landsat images showing ice-dammed lake evolution (10).

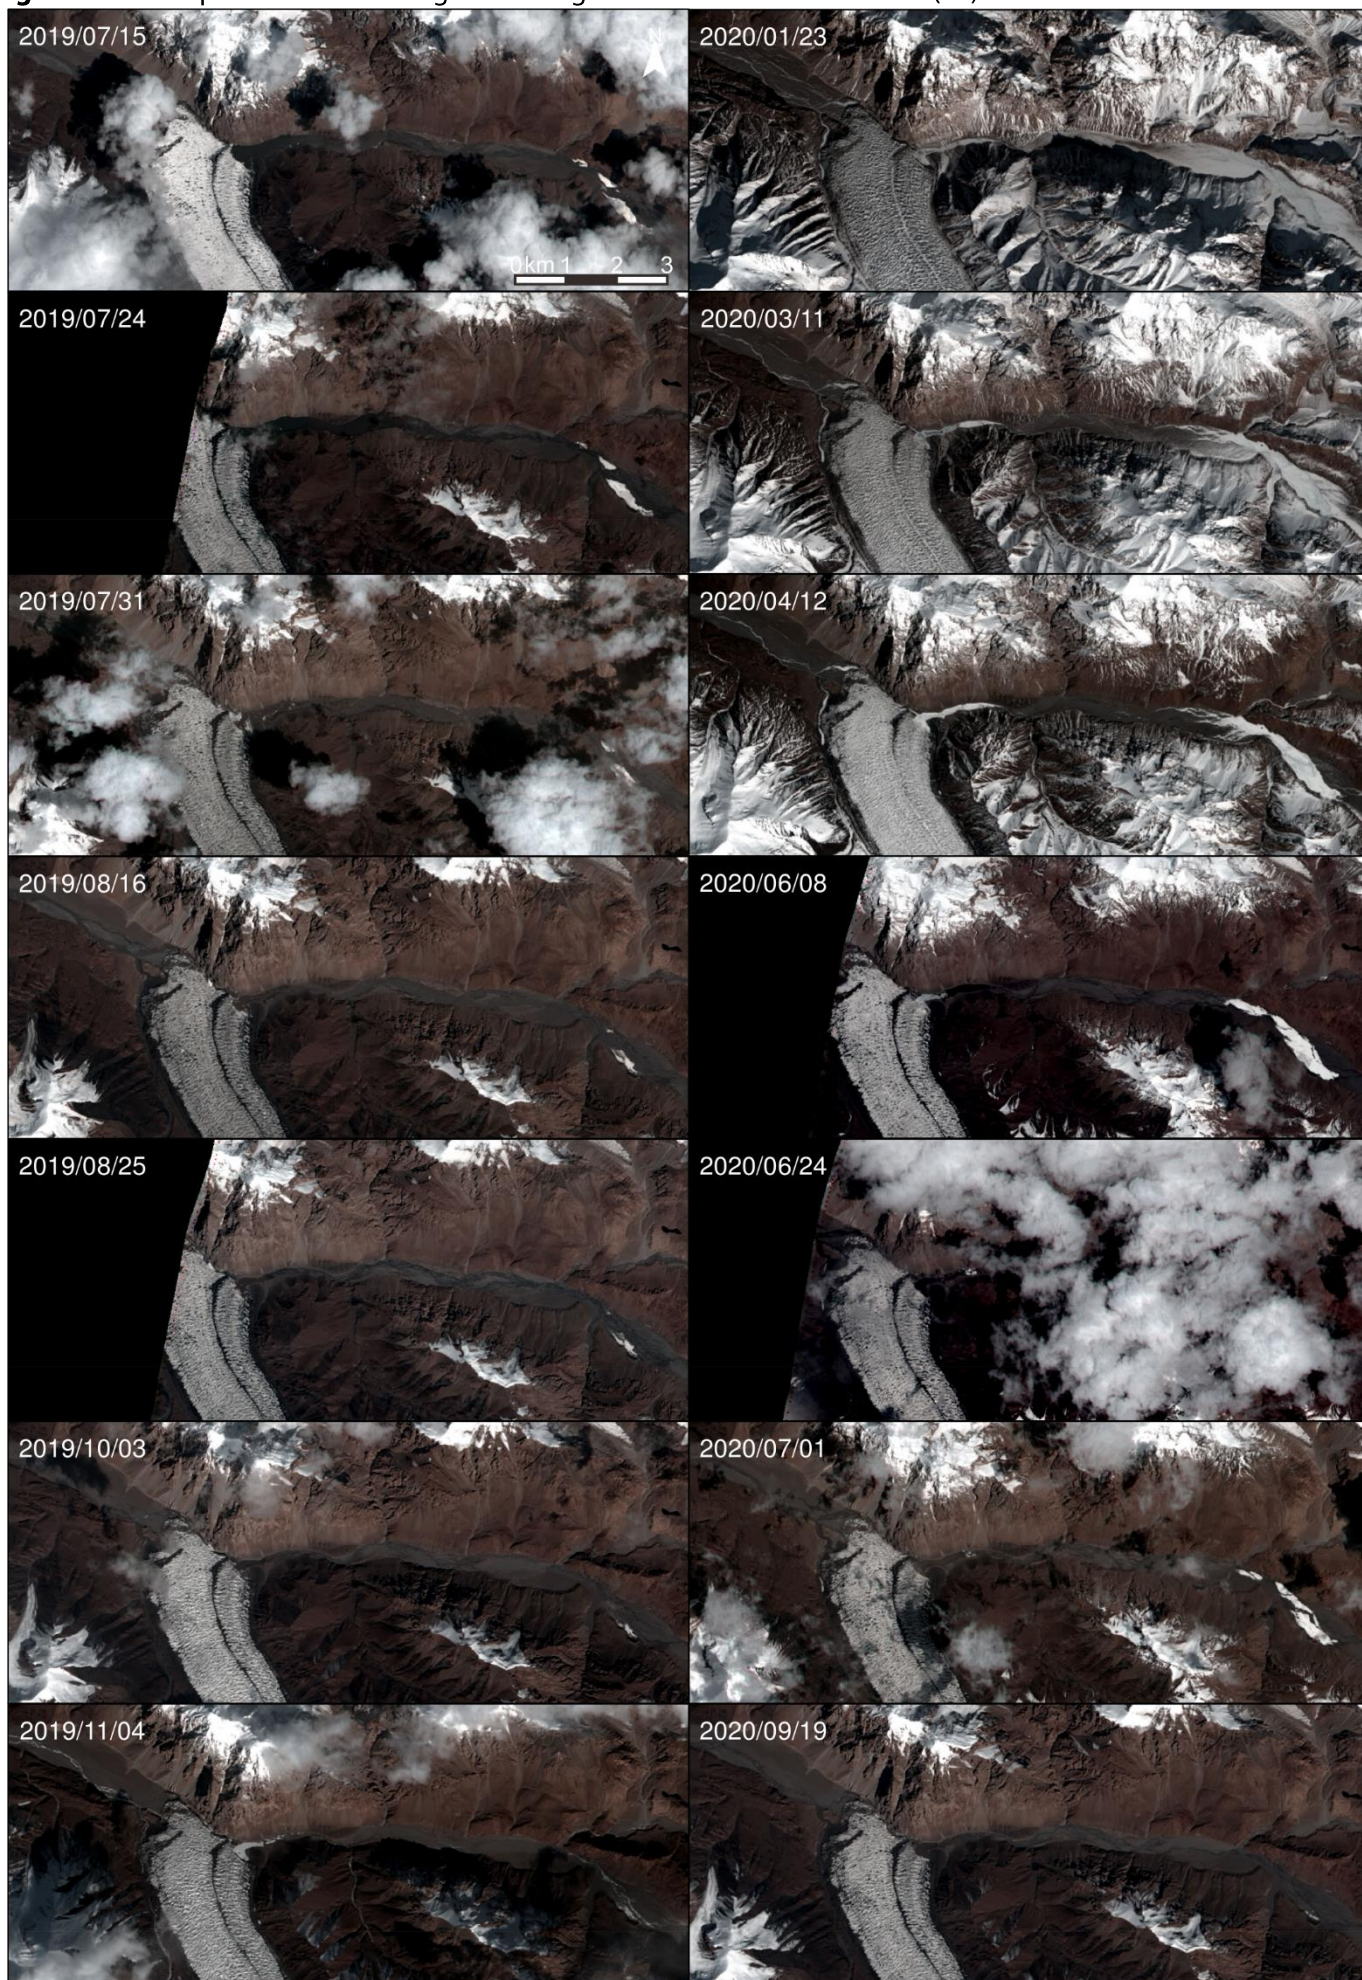



**Figure S11.** Sharpened Landsat images showing ice-dammed lake evolution (11).

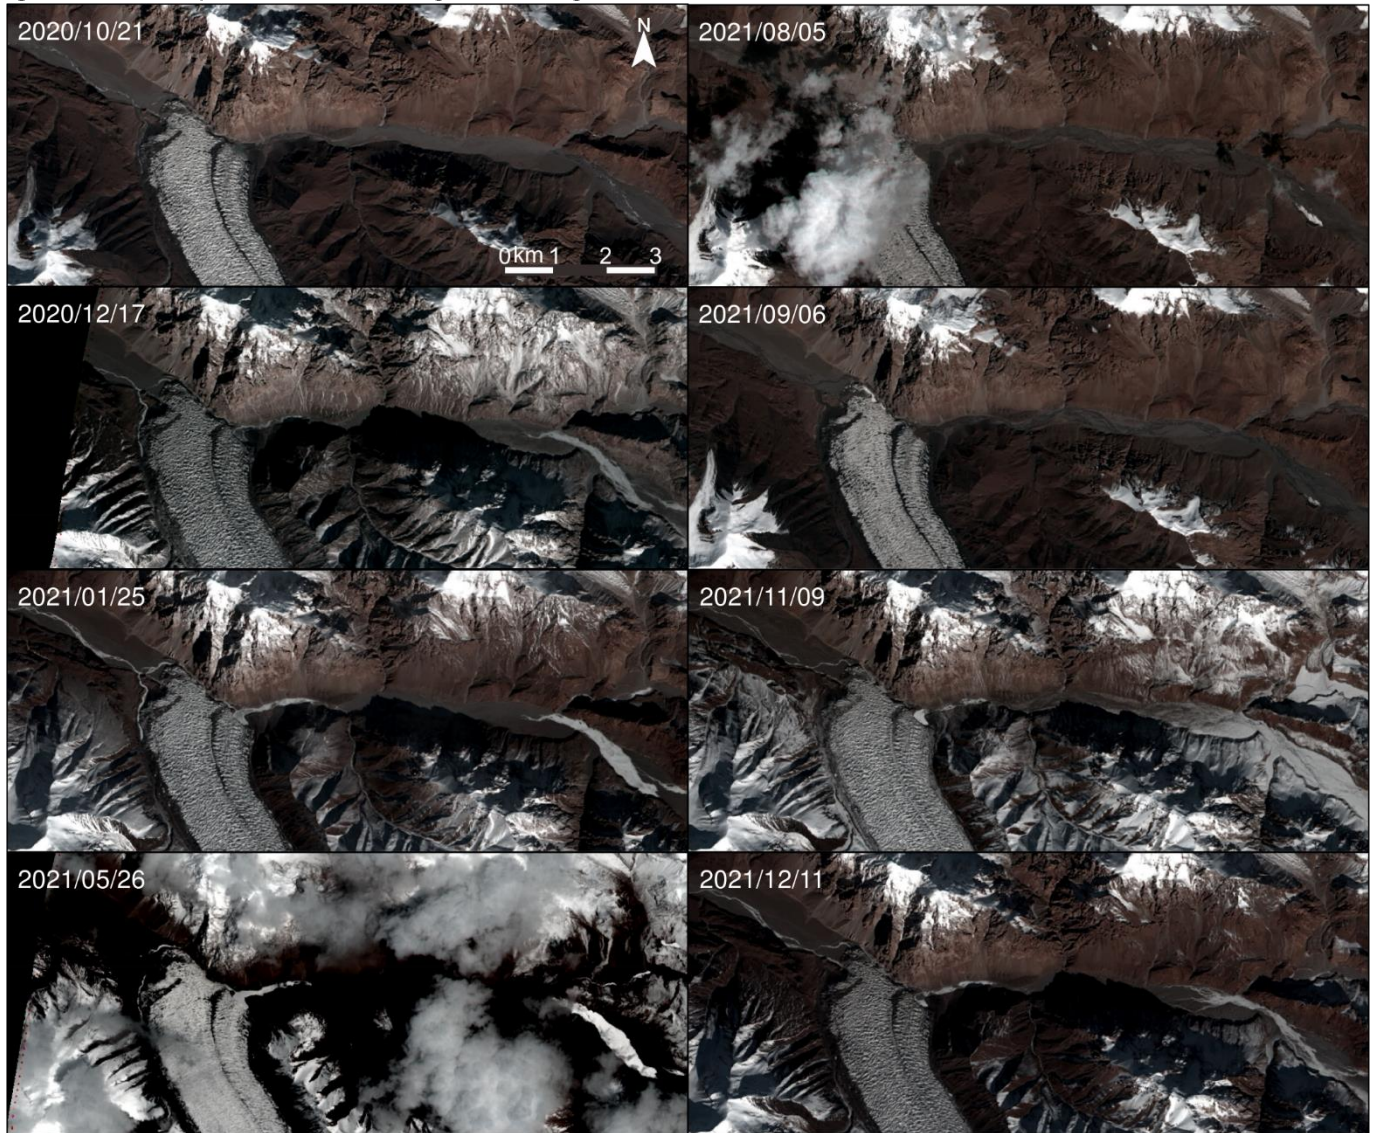

Supplement: Supplementary file 1 [file tc-17-2891-2023-supplement.pdf]
